# Supplementary material for: MCPH1: A Novel Case Report and a Review of the Literature
Source: Genes (Basel). 2022 Apr 2;13(4):634. doi: 10.3390/genes13040634 (PMC9032034; doi:10.3390/genes13040634)
Supplement: Supplementary file 1 [file genes-13-00634-s001.zip › Table S1-MCPH1 Case Report v Literature.xlsx]

## Sheet: Table S1
Table S1. Summary of the clinical findings in families with MCPH1-related primary microcephaly described in the literature.
Study reference	Number of Patientsa	Variant type(s)	Variants (NM_024596.5, NP_078872.3)	Exon(s)	Birth OFC, in SD	OFC (at age), in SD	Stature, in SD	DD/ID	MRI findings	Other findings	Ethnic origin
Jackson 1998, 2002b	7 (2 peds)	nonsense (alternate start?)	c.74C>G, p.S25*	2	microcephaly	-5 to -10 (13-28y)	variable	mild to moderate ID	reduced cortex size, mild cerebellar hypoplasia	no	Pakistani (Mirpur)
Neitzel 2002b	2 sibs	frameshift	c.427dup, p.T143Nfs*5	5	-3.5 to -4	-8 to -10 (5-7y)	-2 to -5	DD, profound ID (poor or no language)	reduced cortex size, pachygyria, mild cerebellar hypoplasia, PNH, ventriculomegaly	slightly upslanted palpebral fissures, thin upper lip, (hyperreflexia in one sib)	n/a
Roberts 2002	7 (2 peds)	unknown (linkage analysis only)	unknown (linkage analysis only)	nk	n/a	-7 to -10 (0-50y in entire MCPH cohort)	n/a	mild to moderate ID (language delay?)	n/a	sloping forehead in some cases	Pakistani (north)
Trimborn 2005	1	missense in BRCT1 (hypomorphic?)	c.80C>G, p.T27R	2	-2	-3 (6y)	-0.5 (normal)	mild ID (normal language, mild fine motor delay)	n/a	mild PCC effect; 2-3 toe syndactyly, upslanted palpebral fissures	German and unknown
Gharshasbi 2008	7 (1 ped)	del ex 1-6	del ex 1-6 and 25kb upstream, p.(?)	1-6	n/a	-3 (18-32y)	-2.5 to -3	moderate ID	n/a	no	Iranian (north)
Farooq 2010c	1	nonsense	c.302C>G, p.S101*	4	n/a	-9 (16y)	-3	moderate ID	n/a	craniosynostosis, ptosis, mild micrognatia, mild exotropia	Danish
Darvish 2010	2 relatives	del ex 4	del ex 4, p.(?)	4	n/a	-10 to -11	n/a	moderate ID	n/a	no	Iranian
Darvish 2010	3 relatives	frameshift	c.566dup, p.N189Kfs*15	6	n/a	-6	n/a	moderate ID	n/a	no	Iranian
Darvish 2010	3 relatives	del ex 2-3	del ex 2-3, p.(?)	2-3	n/a	-6 to -8	n/a	mild to moderate ID	n/a	no	Iranian
Darvish 2010	2 relatives	splice site	c.436+1G>T, p.(?)	intron 5	n/a	-9	n/a	severe ID	n/a	no	Iranian
Darvish 2010	4 relatives	missense in BRCT1	c.147C>G, p.H49Q	3	n/a	-7 to -9	n/a	moderate ID	n/a	no	Iranian
Darvish 2010	2 relatives	del ex 3	del ex 3, p.(?)	3	n/a	-6 to -10	n/a	mild to moderate ID	n/a	no	Iranian
Darvish 2010	3 relatives	missense in BRCT1	c.215C>T, p.S72L	3	n/a	-6 to -7	n/a	mild to moderate ID	n/a	(ataxia and autism, not linked with MCPH1 locus)	Iranian
Leung 2011	1	missense in BRCT1	c.[149T>G;151A>G], p.[V50G;I51V]	3	n/a	<-3.5 (6m)	n/a	n/a	n/a	prenatal cystic hygroma	n/a
Hosseini 2012	1	nonsense	c.136C>T, p.Q46*	3	-5	-4 (2y 4m)	normal	DD/ID (no language)	pachygyria, mild corpus callosum hypoplasia	no	Iranian (northwest)
Ghani-Kakhki 2012	1 (pt.1)	missense in BRCT1	c.215C>T, p.S72L	3	-3.5	-6 (5y 2m)	-3	mild DD/ID	mild ventriculomegaly, small frontal lobes	mild hypotonia	Iraqi
Ghani-Kakhki 2012	1 (pt.2)	missense in BRCT1	c.223T>C, p.W75R	3	-6	-5 (6y 9m)	-0.5 (normal)	mild DD/ID	n/a	no	Turkish
Pfau 2013	1	del ex 1-11	del ex 1-11 and57-83kb upstream, p.(?)	1-11	-3	-5 (10m)	-2	n/a (infant)	coarsened gyral pattern with reduced number of sulci (normal cortex thickness and cerebellum)	small anterior fontanelle, closed posterior fontanelle	Indiani
Perche 2013	1	del ex 6-9 + 7qter del	del ex 6-9, p.(?)	6-9	-1.5	-5 (8y)	-2	severe DD/ID (no language)	normal	failure to thrive, GERD, downslanted palpebral fissures, large ears, scoliosis	n/a
Sajid Hussain 2013	4 relatives	frameshift	c.1179del, p.R393Sfs*50	8	n/a	-8 to -10 (10-18y)	normal	ID (no language)	n/a	aggressive behavior	Pakistani
Ghafouri-Fard 2015	2 sibs	splicing (in-frame del?)	c.322-2A>T, p.R108_Q112del	intron 4	-2.5 to -3	-5 to -12 (15-18y)	-1 to -3	none to severe ID	normal	no	Iranian
Alazami 2015	2 related	del ex 1-2	c.1_114del, p.(?)	1-2	n/a	microcephaly	n/a	DD/ID	n/a	n/a	n/a
Ahmad 2017	7 relatives	del ex 1-2	del ex 1-2 and 18kb upstream, p.M1_N95del	1-2	n/a	-6 to -7 (18-44y)	normal	mild ID	n/a	no	Pakistani (Punjabi)
Ahmad 2017	3 relatives	del ex 1-11	del ex 1-11 and 350kb upstream, p.(M1_A761del)	1-11	n/a	-6 to -7 (10-27y)	normal	mild ID	n/a	irritability	Pakistani (Baloch)
Hemmat 2017	2 sibs	del ex 1-8	del ex 1-8 and 203kb upstream, p.(?)	1-8	n/a	-3.5 (3-14y)	short	mild DD, ID (poor language)	normal (small lipoma)	epicanthus, esotropia, low hairline, large ears, thin upper lip; (right lung hypoplasia in 1 sib)	Hispanic
Naseer 2018	2 sibs	missense (central region)	c.[982G>A];[1273T>A], p.[V310I];[Y425N]	8	microcephaly	-5 to -6 (5-10y)	n/a	severe ID (poor language)	n/a	sloping forehead	Saudi
McSherry 2018	1	frameshift	c.427dup, p.T143Nfs*5	5	n/a	microcephaly (1.5m)	normal	n/a (infant)	cortical atrophy, deep sulcation	long philtrum, large ears, dermatitis	Turkish
Duerinckx 2018	2 sibs	nonsensed + biallelic TRAPPC9 missense	c.2221C>T, p.R741*		microcephaly	-3 to -4 (13-16y)	-1.5 (low normal)	DD, severe ID (poor or no language)	corpus callosum and cerebellum hypoplasia/atrophy, mild colpocephaly	hyperkinetic movements, epilepsy	Moroccan
This report	1	del ex 1-8	del ex 1-8 and 27kb upstream, p.(?)	1-8	-3.5	-5 (10y)	-2	mild DD, profound ID (no language)	frontopolar simplified gyral pattern, mild ventriculomegaly, enlarged posterior fossa, PNH	sloping forehead, highly arched eyebrow, exotropia, epicanthus, large ears; hyperactivity	Pakistani (northeast)
	#=number, OFC=occipito-frontal circumference, SD=standard deviations (approximated to nearest 0.5 increment), DD=developmental delay, ID=intellectual disability, MRI=magnetic resonance imaging, peds=pedigrees, sibs=siblings, nk=not known/not evaluated, del=deletion, ex=exon(s), y=years, m=months, PNH=periventricular nodular heterotopia, PCC=premature chromosome condensation, GERD=gastroesophageal…
